# Supplementary material for: TLR2 Signaling Pathway Combats Streptococcus uberis Infection by Inducing Mitochondrial Reactive Oxygen Species Production
Source: PubMed Central journal article supplement (PMC7072855; doi:10.3390/cells9020494), 2020-02-21
Supplement: cells-09-00494-s001.pdf [file cells-09-00494-s001.pdf]

**Table S1.** Oligonucleotide sequences used for qPCR.

| Gene          | Primers sequence (5'-3')   | Orientation |
|---------------|----------------------------|-------------|
| GAPDH         | GTTCAACTATTGGTGCTGG        | Forward     |
|               | TCATTAGGTCCCCTTTGT         | Reverse     |
| TNF- $\alpha$ | CATCTTCTCAA AATTCGAGTGACAA | Forward     |
|               | TGGGAGTAGACAAGGTAGAACCC    | Reverse     |
| IL-1 $\beta$  | AACCTGCTGGTGTGTGACGTC      | Forward     |
|               | CAGCACGAGGCTTTTTTGTGT      | Reverse     |
| IL-6          | TGGAGTCACAGAAGGAGTGGCTAAG  | Forward     |
|               | TCTGACCACAGTGAGGAATGTCCAC  | Reverse     |
| TLR2          | TGCAAGTACGAACTGGACTTCT     | Forward     |
|               | CCAGGTAGGTCTTGGTGTTCATT    | Reverse     |
| TLR4          | TAGCCATTGCTGCCAACATCAT     | Forward     |
|               | AAGATACACCAACGGCTCTGAA     | Reverse     |

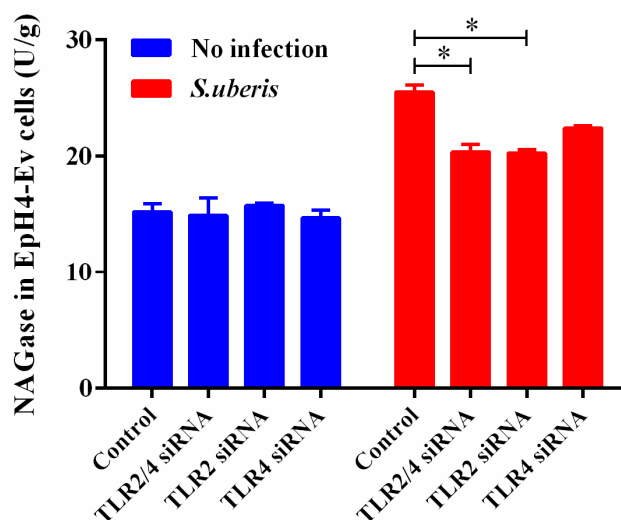

**Figure S1** TLR2/4 mediate the NAGase activity after challenge with *S. uberis* in the supernatant of MECs. Experiments were repeated three times and data were presented as the means  $\pm$  SEM (n = 3). \*( $P < 0.05$ ) = significantly different between the indicated groups.

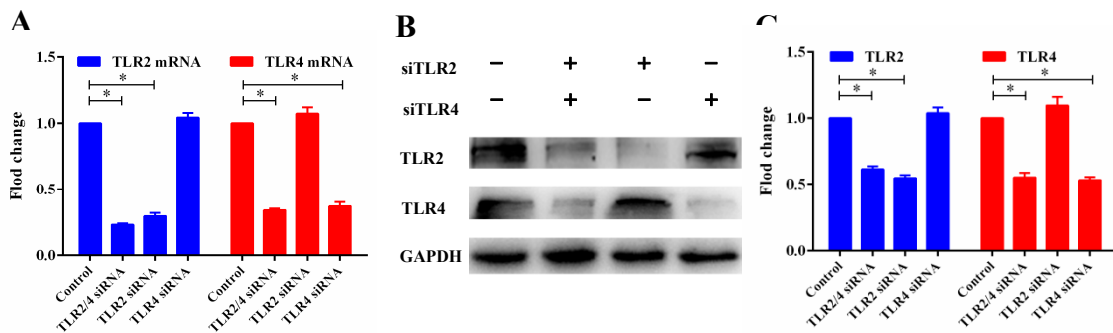

**Figure S2 TLR2/4 mediate inflammatory response after challenge with *S. uberis* in MECs.** MECs were transfected with 50nM siTLR2 or/and siTLR4 for 72 h. Then cells were infected with *S. uberis* in mid-exponential phase at a multiplicity of infection (MOI) of 10 for 3 h at 37 °C. The modulating effects of siRNAs were confirmed by RT-qPCR (A) and western blotting (B, C). Experiments were repeated three times and data were presented as the means  $\pm$  SEM (n = 3). \*( $P < 0.05$ ) = significantly different between the indicated groups.

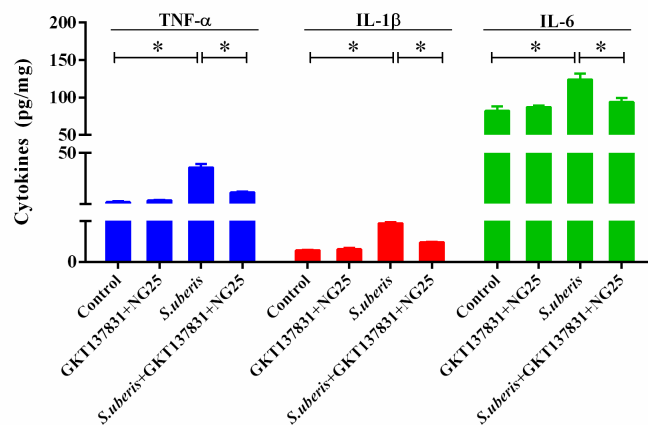

**Figure S3 Limiting mROS reduces the inflammation factors after challenge with *S. uberis* in the supernatant of MECs.** Experiments were repeated three times and data were presented as the means  $\pm$  SEM (n = 3). \*( $P < 0.05$ ) = significantly different between the indicated groups.

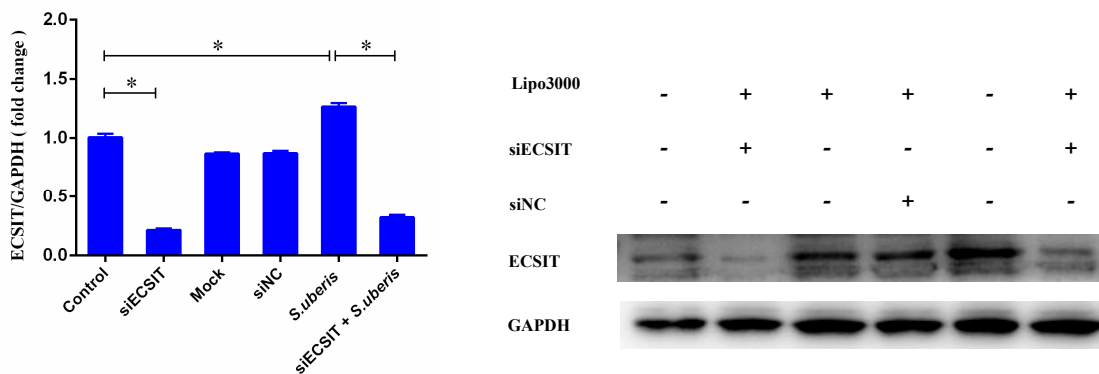

**Figure S4** The protein expression of ECSIT were determined by Western blot after using siECSIT in MECs. Experiments were repeated three times and data were presented as the means  $\pm$  SEM (n = 3).  $*(P < 0.05)$  = significantly different between the indicated groups.
